# Supplementary material
Source: PubMed Central journal article supplement (PMC2672546)
Supplement: 0902029106_0902029106SI.pdf [file 0902029106_0902029106SI.pdf]

**Table S1. Amino acid usage in multispanning membrane proteins (mem), cytoplasmic proteins (cyto), and multispanning/cytoplasmic (mem/cyto)**

| Organism-location | W    | F    | L     | I     | S    | Y    | M    | V    | T    | C    | A     | G     | P    | N    | H    | Q    | R    | K     | D    | E    |
|-------------------|------|------|-------|-------|------|------|------|------|------|------|-------|-------|------|------|------|------|------|-------|------|------|
| ECOLI cyto        | 1.13 | 3.53 | 10.16 | 5.86  | 5.09 | 2.56 | 2.77 | 7.13 | 5.15 | 1.17 | 9.48  | 7.25  | 4.30 | 3.69 | 2.61 | 4.49 | 5.82 | 4.79  | 5.87 | 7.16 |
| ECOLI mem         | 2.24 | 5.67 | 13.76 | 7.88  | 6.12 | 2.65 | 3.72 | 8.24 | 5.27 | 0.93 | 10.18 | 8.17  | 4.10 | 3.00 | 1.63 | 3.13 | 4.24 | 3.03  | 2.88 | 3.16 |
| ECOLI mem/cyto    | 1.98 | 1.61 | 1.35  | 1.34  | 1.20 | 1.04 | 1.35 | 1.16 | 1.02 | 0.80 | 1.07  | 1.13  | 0.96 | 0.81 | 0.62 | 0.70 | 0.73 | 0.63  | 0.49 | 0.44 |
| STRCO cyto        | 0.97 | 2.61 | 9.48  | 3.84  | 4.56 | 2.05 | 1.94 | 8.99 | 5.92 | 0.72 | 12.54 | 9.46  | 5.23 | 2.06 | 2.27 | 2.74 | 7.38 | 3.32  | 6.75 | 7.19 |
| STRCO mem         | 1.92 | 4.60 | 11.75 | 5.02  | 5.25 | 2.20 | 2.50 | 9.49 | 5.88 | 0.57 | 13.20 | 10.40 | 4.89 | 1.99 | 1.69 | 2.41 | 5.82 | 2.51  | 3.96 | 3.91 |
| STRCO mem/cyto    | 1.98 | 1.76 | 1.24  | 1.31  | 1.15 | 1.07 | 1.29 | 1.05 | 0.99 | 0.78 | 1.05  | 1.10  | 0.94 | 0.97 | 0.74 | 0.88 | 0.79 | 0.75  | 0.59 | 0.54 |
| MYCLE cyto        | 0.99 | 2.72 | 9.81  | 4.72  | 5.42 | 2.12 | 2.08 | 9.58 | 5.90 | 0.93 | 11.68 | 8.76  | 4.64 | 2.45 | 2.30 | 3.08 | 7.20 | 2.99  | 6.69 | 5.93 |
| MYCLE mem         | 1.90 | 4.53 | 11.75 | 6.14  | 5.82 | 2.30 | 2.60 | 9.82 | 6.55 | 0.89 | 11.68 | 8.67  | 4.88 | 2.62 | 1.93 | 2.80 | 5.93 | 2.23  | 3.71 | 3.27 |
| MYCLE mem/cyto    | 1.92 | 1.66 | 1.20  | 1.30  | 1.07 | 1.08 | 1.25 | 1.03 | 1.11 | 0.96 | 1.00  | 0.99  | 1.05 | 1.07 | 0.84 | 0.91 | 0.82 | 0.75  | 0.55 | 0.55 |
| BACSU cyto        | 0.71 | 3.63 | 8.96  | 6.97  | 5.41 | 3.16 | 2.80 | 7.17 | 5.28 | 0.84 | 7.71  | 7.33  | 3.65 | 3.78 | 2.49 | 3.75 | 4.50 | 7.30  | 5.89 | 8.67 |
| BACSU mem         | 1.40 | 6.74 | 12.47 | 9.89  | 6.68 | 3.17 | 3.46 | 7.81 | 5.40 | 0.66 | 8.56  | 7.87  | 3.39 | 3.03 | 1.62 | 2.83 | 3.06 | 5.07  | 2.95 | 3.93 |
| BACSU mem/cyto    | 1.98 | 1.86 | 1.39  | 1.42  | 1.23 | 1.00 | 1.24 | 1.09 | 1.02 | 0.79 | 1.11  | 1.07  | 0.93 | 0.80 | 0.65 | 0.76 | 0.68 | 0.69  | 0.50 | 0.45 |
| ARCFU cyto        | 0.85 | 3.72 | 8.30  | 7.10  | 4.91 | 3.23 | 2.70 | 9.27 | 4.06 | 1.02 | 8.05  | 7.55  | 3.87 | 2.87 | 1.52 | 2.08 | 6.07 | 7.64  | 5.38 | 9.82 |
| ARCFU mem         | 1.44 | 7.10 | 13.42 | 9.18  | 6.64 | 4.10 | 2.33 | 9.30 | 4.52 | 0.56 | 9.78  | 7.62  | 3.78 | 2.54 | 1.10 | 1.63 | 3.74 | 3.84  | 2.85 | 4.53 |
| ARCFU mem/cyto    | 1.70 | 1.91 | 1.62  | 1.29  | 1.35 | 1.27 | 0.87 | 1.00 | 1.11 | 0.54 | 1.22  | 1.01  | 0.98 | 0.88 | 0.72 | 0.78 | 0.62 | 0.50  | 0.53 | 0.46 |
| METJA cyto        | 0.57 | 3.54 | 8.58  | 9.82  | 3.91 | 3.53 | 2.54 | 7.26 | 4.22 | 1.23 | 6.69  | 6.86  | 3.62 | 4.57 | 1.54 | 1.67 | 3.89 | 10.53 | 5.72 | 9.73 |
| METJA mem         | 1.00 | 6.61 | 13.08 | 13.83 | 5.99 | 4.61 | 2.76 | 7.39 | 4.41 | 0.89 | 6.74  | 7.44  | 3.23 | 3.74 | 1.03 | 1.05 | 2.32 | 6.56  | 3.07 | 4.25 |
| METJA mem/cyto    | 1.76 | 1.87 | 1.52  | 1.41  | 1.53 | 1.30 | 1.09 | 1.02 | 1.05 | 0.72 | 1.01  | 1.09  | 0.89 | 0.82 | 0.66 | 0.63 | 0.60 | 0.62  | 0.54 | 0.44 |
| YEAST cyto        | 0.90 | 3.97 | 8.63  | 6.09  | 7.77 | 3.29 | 1.99 | 6.23 | 5.64 | 1.17 | 6.61  | 5.66  | 4.59 | 5.53 | 2.33 | 3.95 | 5.04 | 8.32  | 5.68 | 6.59 |
| YEAST mem         | 1.73 | 7.17 | 11.07 | 7.90  | 9.38 | 4.06 | 2.56 | 6.60 | 5.59 | 2.06 | 6.05  | 5.54  | 4.05 | 4.53 | 1.91 | 2.87 | 3.93 | 5.13  | 3.71 | 4.15 |
| YEAST mem/cyto    | 1.93 | 1.81 | 1.28  | 1.30  | 1.21 | 1.24 | 1.28 | 1.06 | 0.99 | 1.76 | 0.92  | 0.98  | 0.88 | 0.82 | 0.82 | 0.73 | 0.78 | 0.62  | 0.65 | 0.63 |
| ARATH cyto        | 1.04 | 4.17 | 8.64  | 5.57  | 7.25 | 2.89 | 2.67 | 7.45 | 5.26 | 1.61 | 7.12  | 7.33  | 4.64 | 3.96 | 2.25 | 3.49 | 5.02 | 6.85  | 5.78 | 7.03 |
| ARATH mem         | 1.64 | 6.02 | 11.08 | 6.97  | 8.08 | 3.20 | 2.79 | 7.83 | 5.53 | 1.62 | 7.84  | 7.21  | 4.03 | 3.48 | 1.78 | 2.91 | 4.53 | 4.90  | 3.89 | 4.69 |
| ARATH mem/cyto    | 1.58 | 1.44 | 1.28  | 1.25  | 1.11 | 1.11 | 1.04 | 1.05 | 1.05 | 1.01 | 1.10  | 0.98  | 0.87 | 0.88 | 0.79 | 0.83 | 0.90 | 0.72  | 0.67 | 0.67 |
| CAEEL cyto        | 0.93 | 3.84 | 8.59  | 5.77  | 6.93 | 2.89 | 2.61 | 6.80 | 5.41 | 1.49 | 7.54  | 6.02  | 3.99 | 4.56 | 2.37 | 4.25 | 5.42 | 7.02  | 6.05 | 7.53 |
| CAEEL mem         | 1.66 | 7.07 | 10.82 | 8.52  | 7.91 | 4.39 | 3.04 | 7.19 | 6.06 | 2.25 | 6.20  | 4.76  | 4.05 | 4.21 | 2.13 | 3.13 | 4.32 | 4.56  | 3.56 | 4.15 |
| CAEEL mem/cyto    | 1.79 | 1.84 | 1.26  | 1.48  | 1.14 | 1.52 | 1.17 | 1.06 | 1.12 | 1.51 | 0.82  | 0.79  | 1.01 | 0.92 | 0.90 | 0.74 | 0.80 | 0.65  | 0.59 | 0.55 |
| MOUSE cyto        | 1.13 | 3.66 | 9.51  | 4.62  | 7.31 | 2.75 | 2.45 | 6.31 | 5.02 | 2.09 | 6.83  | 6.37  | 5.87 | 3.61 | 2.41 | 4.75 | 5.43 | 6.62  | 5.41 | 7.84 |
| MOUSE mem         | 1.78 | 5.93 | 12.70 | 6.12  | 8.05 | 3.53 | 2.75 | 7.51 | 5.60 | 2.71 | 7.44  | 6.28  | 4.77 | 3.35 | 2.25 | 3.27 | 4.68 | 3.81  | 3.26 | 4.22 |
| MOUSE mem/cyto    | 1.58 | 1.62 | 1.33  | 1.33  | 1.10 | 1.28 | 1.12 | 1.19 | 1.12 | 1.30 | 1.09  | 0.99  | 0.81 | 0.93 | 0.93 | 0.69 | 0.86 | 0.58  | 0.60 | 0.54 |
| HUMAN cyto        | 1.13 | 3.64 | 9.56  | 4.67  | 7.20 | 2.76 | 2.39 | 6.20 | 5.02 | 2.04 | 6.87  | 6.47  | 5.87 | 3.64 | 2.39 | 4.74 | 5.43 | 6.67  | 5.33 | 7.96 |
| HUMAN mem         | 1.63 | 6.04 | 12.91 | 6.37  | 7.93 | 3.53 | 2.89 | 7.50 | 5.62 | 2.79 | 7.54  | 6.22  | 4.86 | 3.30 | 2.33 | 3.15 | 4.49 | 3.76  | 3.16 | 3.99 |
| HUMAN mem/cyto    | 1.44 | 1.66 | 1.35  | 1.36  | 1.10 | 1.28 | 1.21 | 1.21 | 1.12 | 1.37 | 1.10  | 0.96  | 0.83 | 0.91 | 0.98 | 0.67 | 0.83 | 0.56  | 0.59 | 0.50 |

**Table S2. Summary of Table S1 and average  $\pm$  SD**

| Organism mem/cyto | W     | F     | L     | I     | S     | Y     | M     | V     | T     | C     | A     | G     | P     | N    | H    | Q    | R    | K    | D    | E    |
|-------------------|-------|-------|-------|-------|-------|-------|-------|-------|-------|-------|-------|-------|-------|------|------|------|------|------|------|------|
| ECOLI             | 1.98  | 1.61  | 1.35  | 1.34  | 1.20  | 1.04  | 1.35  | 1.16  | 1.02  | 0.80  | 1.07  | 1.13  | 0.96  | 0.81 | 0.62 | 0.70 | 0.73 | 0.63 | 0.49 | 0.44 |
| STRCO             | 1.98  | 1.76  | 1.24  | 1.31  | 1.15  | 1.07  | 1.29  | 1.05  | 0.99  | 0.78  | 1.05  | 1.10  | 0.94  | 0.97 | 0.74 | 0.88 | 0.79 | 0.75 | 0.59 | 0.54 |
| MYCLE             | 1.92  | 1.66  | 1.20  | 1.30  | 1.07  | 1.08  | 1.25  | 1.03  | 1.11  | 0.96  | 1.00  | 0.99  | 1.05  | 1.07 | 0.84 | 0.91 | 0.82 | 0.75 | 0.55 | 0.55 |
| BACSU             | 1.98  | 1.86  | 1.39  | 1.42  | 1.23  | 1.00  | 1.24  | 1.09  | 1.02  | 0.79  | 1.11  | 1.07  | 0.93  | 0.80 | 0.65 | 0.76 | 0.68 | 0.69 | 0.50 | 0.45 |
| ARCFU             | 1.70  | 1.91  | 1.62  | 1.29  | 1.35  | 1.27  | 0.87  | 1.00  | 1.11  | 0.54  | 1.22  | 1.01  | 0.98  | 0.88 | 0.72 | 0.78 | 0.62 | 0.50 | 0.53 | 0.46 |
| METJA             | 1.76  | 1.87  | 1.52  | 1.41  | 1.53  | 1.30  | 1.09  | 1.02  | 1.05  | 0.72  | 1.01  | 1.09  | 0.89  | 0.82 | 0.66 | 0.63 | 0.60 | 0.62 | 0.54 | 0.44 |
| YEAST             | 1.93  | 1.81  | 1.28  | 1.30  | 1.21  | 1.24  | 1.28  | 1.06  | 0.99  | 1.76  | 0.92  | 0.98  | 0.88  | 0.82 | 0.82 | 0.73 | 0.78 | 0.62 | 0.65 | 0.63 |
| ARATH             | 1.58  | 1.44  | 1.28  | 1.25  | 1.11  | 1.11  | 1.04  | 1.05  | 1.05  | 1.01  | 1.10  | 0.98  | 0.87  | 0.88 | 0.79 | 0.83 | 0.90 | 0.72 | 0.67 | 0.67 |
| CAEEL             | 1.79  | 1.84  | 1.26  | 1.48  | 1.14  | 1.52  | 1.17  | 1.06  | 1.12  | 1.51  | 0.82  | 0.79  | 1.01  | 0.92 | 0.90 | 0.74 | 0.80 | 0.65 | 0.59 | 0.55 |
| MOUSE             | 1.58  | 1.62  | 1.33  | 1.33  | 1.10  | 1.28  | 1.12  | 1.19  | 1.12  | 1.30  | 1.09  | 0.99  | 0.81  | 0.93 | 0.93 | 0.69 | 0.86 | 0.58 | 0.60 | 0.54 |
| HUMAN             | 1.44  | 1.66  | 1.35  | 1.36  | 1.10  | 1.28  | 1.21  | 1.21  | 1.12  | 1.37  | 1.10  | 0.96  | 0.83  | 0.91 | 0.98 | 0.67 | 0.83 | 0.56 | 0.59 | 0.50 |
| Total             | 19.64 | 19.04 | 14.82 | 14.79 | 13.19 | 13.19 | 12.91 | 11.92 | 11.70 | 11.54 | 11.49 | 11.09 | 10.15 | 9.81 | 8.65 | 8.32 | 8.41 | 7.07 | 6.30 | 5.77 |
| Average           | 1.79  | 1.73  | 1.35  | 1.34  | 1.20  | 1.20  | 1.17  | 1.08  | 1.06  | 1.05  | 1.04  | 1.01  | 0.92  | 0.89 | 0.79 | 0.76 | 0.76 | 0.64 | 0.57 | 0.52 |
| SD                | 0.19  | 0.14  | 0.12  | 0.07  | 0.14  | 0.15  | 0.14  | 0.07  | 0.05  | 0.38  | 0.11  | 0.09  | 0.07  | 0.08 | 0.12 | 0.09 | 0.10 | 0.08 | 0.06 | 0.08 |

**Table S3. Phe, Ile, and Leu codon usage in multispanning membrane proteins (mem), cytoplasmic proteins (cyto), and multispanning/cytoplasmic (mem/cyto)**

| Amino acid name      | Codon | mem % usage | Total mem codons | cyto % usage | Total cyto codons | Usage mem/cyto |
|----------------------|-------|-------------|------------------|--------------|-------------------|----------------|
| <i>E. coli</i>       |       |             |                  |              |                   |                |
| Phe                  | TTC   | 43.66       | 6,079            | 48.87        | 2,662             | 0.893390628    |
| Phe                  | TTT   | 56.34       | 7,846            | 51.13        | 2,785             | 1.101897125    |
| Ile                  | ATA   | 5.85        | 1,146            | 3.66         | 323               | 1.598360656    |
| Ile                  | ATC   | 42.16       | 8,254            | 46.9         | 4,135             | 0.898933902    |
| Ile                  | ATT   | 51.98       | 10,176           | 49.43        | 4,358             | 1.051588104    |
| Leu                  | CTA   | 3.56        | 1,231            | 2.68         | 418               | 1.328358209    |
| Leu                  | CTC   | 10.25       | 3,544            | 10.31        | 1,607             | 0.994180407    |
| Leu                  | CTG   | 50.36       | 17,418           | 55.9         | 8,714             | 0.900894454    |
| Leu                  | CTT   | 9.14        | 3,160            | 9.65         | 1,504             | 0.947150259    |
| Leu                  | TTA   | 12.46       | 4,311            | 10.52        | 1,640             | 1.184410646    |
| Leu                  | TTG   | 14.24       | 4,926            | 10.94        | 1,705             | 1.301645338    |
| <i>M. Jannaschii</i> |       |             |                  |              |                   |                |
| Phe                  | TTC   | 19.85       | 461              | 25.55        | 382               | 0.776908023    |
| Phe                  | TTT   | 80.15       | 1,862            | 74.45        | 1,113             | 1.076561451    |
| Ile                  | ATA   | 44.56       | 2,192            | 43.25        | 1,676             | 1.030289017    |
| Ile                  | ATC   | 10.49       | 516              | 10.25        | 397               | 1.023414634    |
| Ile                  | ATT   | 44.95       | 2,211            | 46.5         | 1,802             | 0.966666667    |
| Leu                  | CTA   | 9.26        | 433              | 6.89         | 240               | 1.343976778    |
| Leu                  | CTC   | 3.72        | 174              | 2.73         | 95                | 1.362637363    |
| Leu                  | CTG   | 3.29        | 154              | 1.92         | 67                | 1.713541667    |
| Leu                  | CTT   | 10.83       | 506              | 7.49         | 261               | 1.445927904    |
| Leu                  | TTA   | 52.63       | 2,460            | 60.75        | 2,116             | 0.866337449    |
| Leu                  | TTG   | 20.26       | 947              | 20.21        | 704               | 1.002474023    |
| <i>A. thaliana</i>   |       |             |                  |              |                   |                |
| Phe                  | TTC   | 53.77       | 11,838           | 52.37        | 2,513             | 1.026732862    |
| Phe                  | TTT   | 46.23       | 10,177           | 47.63        | 2,286             | 0.97060676     |
| Ile                  | ATA   | 24.62       | 6,506            | 18.04        | 1,151             | 1.364745011    |
| Ile                  | ATC   | 37.46       | 9,900            | 39.35        | 2,511             | 0.951969504    |
| Ile                  | ATT   | 37.91       | 10,019           | 42.61        | 2,719             | 0.889697254    |
| Leu                  | CTA   | 10.96       | 4,536            | 9.75         | 974               | 1.124102564    |
| Leu                  | CTC   | 18.68       | 7,730            | 18.35        | 1,833             | 1.017983651    |
| Leu                  | CTG   | 9.49        | 3,927            | 10.84        | 1,083             | 0.875461255    |
| Leu                  | CTT   | 26.3        | 10,886           | 29.84        | 2,981             | 0.881367292    |
| Leu                  | TTA   | 13.63       | 5,640            | 10.42        | 1,041             | 1.30806142     |
| Leu                  | TTG   | 20.95       | 8,672            | 20.79        | 2,077             | 1.007696008    |
| <i>M. musculus</i>   |       |             |                  |              |                   |                |
| Phe                  | TTC   | 60.84       | 26,035           | 53.84        | 7,667             | 1.130014859    |
| Phe                  | TTT   | 39.16       | 16,759           | 46.16        | 6,574             | 0.848353553    |
| Ile                  | ATA   | 14.08       | 6,357            | 15.71        | 2,780             | 0.89624443     |
| Ile                  | ATC   | 55.33       | 24,979           | 49.06        | 8,684             | 1.127802691    |
| Ile                  | ATT   | 30.59       | 13,809           | 35.24        | 6,237             | 0.868047673    |
| Leu                  | CTA   | 6.88        | 6,414            | 7.55         | 2,866             | 0.911258278    |
| Leu                  | CTC   | 23.08       | 21,520           | 18.59        | 7,059             | 1.241527703    |
| Leu                  | CTG   | 40.72       | 37,958           | 40.06        | 15,210            | 1.016475287    |
| Leu                  | CTT   | 11.8        | 10,999           | 13.35        | 5,070             | 0.883895131    |
| Leu                  | TTA   | 5.35        | 4,984            | 7.16         | 2,717             | 0.747206704    |
| Leu                  | TTG   | 12.18       | 11,351           | 13.3         | 5,050             | 0.915789474    |
